# Supplementary material for: Anomalous inclusion of chloride ions in ethylenediammonium lead iodide turns 1D non-perovskite into a 2D perovskite structure
Source: Royal Society of Chemistry journal article supplement (doi:10.1039/d0ce00184h), 2020-01-01
Supplement: d0ce00184h1.pdf [file d0ce00184h1.pdf]

**Supplementary information**

**Anomalous inclusion of chloride ions in ethylenediammonium lead iodide  
turns 1D non-perovskite to 2D perovskite structure**

Monireh Fazayeli<sup>a</sup>, Maasoumeh Khatamian\*<sup>a</sup> and Giuseppe Cruciani<sup>b</sup>

<sup>a</sup>Department of Inorganic Chemistry, Faculty of Chemistry, University of Tabriz, Tabriz, Iran

<sup>b</sup>Department of Physics and Earth Sciences, University of Ferrara, Ferrara, Italy

Corresponding Email: [khatamian@tabrizu.ac.ir](mailto:khatamian@tabrizu.ac.ir)

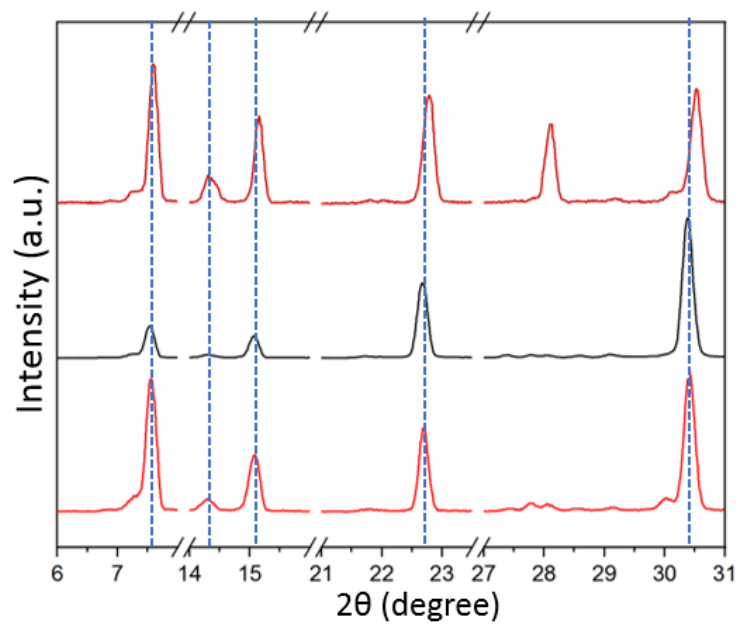

Figure S1. Close-up views of the XRD patterns of  $[(ED)_2PbI_4]Cl_2$  (red),  $CC-[(ED)_2PbI_4]Cl_2$  (black), and the sample obtained from heating the colour-changed crystals at  $100^\circ C$  (dark red)

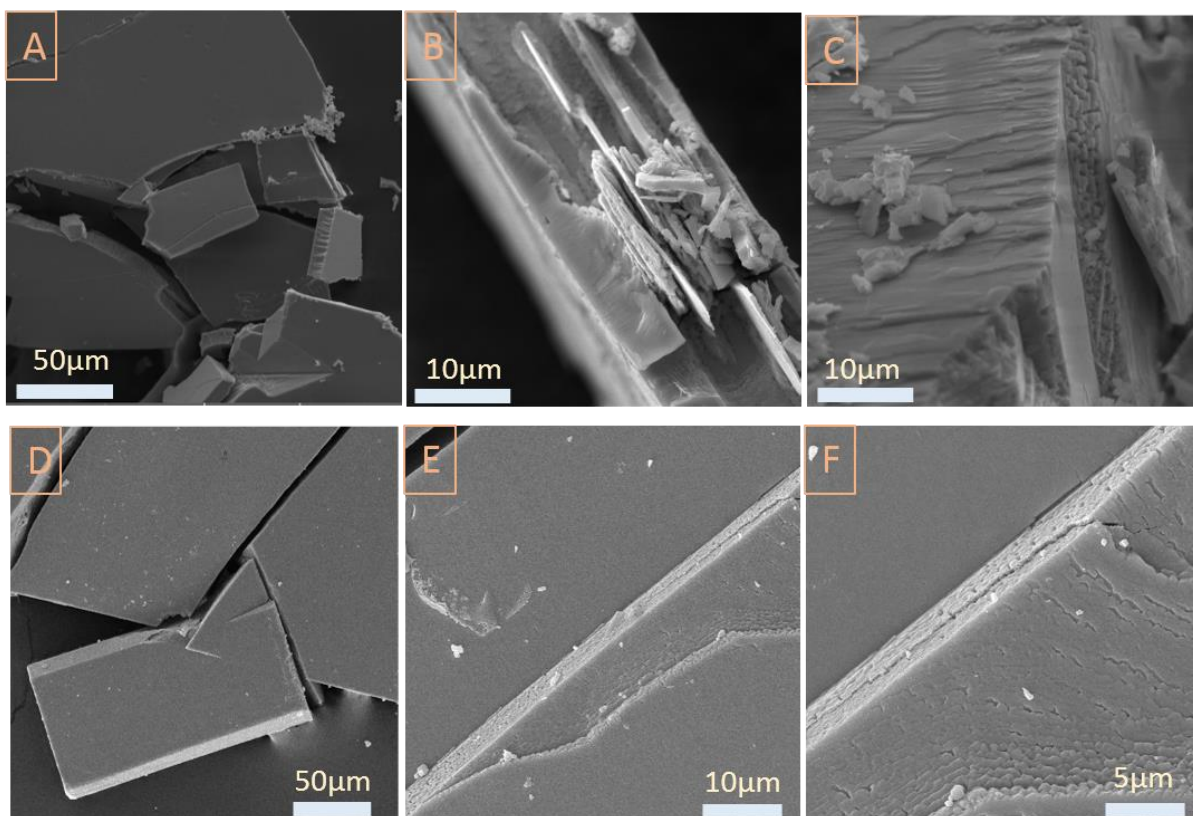

Figure S2. FESEM images at different magnifications for  $[(ED)_2PbI_4]Cl_2$  (A, B, C) and  $CC-[(ED)_2PbI_4]Cl_2$  (D, E, F)

Table S1. Crystallographic data of EDPbI<sub>4</sub> and [(ED)<sub>2</sub>PbI<sub>4</sub>]Cl<sub>2</sub>

|                             | EDPbI <sub>4</sub> [1]                                                               | [(ED) <sub>2</sub> PbI <sub>4</sub> ]Cl <sub>2</sub>                           |
|-----------------------------|--------------------------------------------------------------------------------------|--------------------------------------------------------------------------------|
| Empirical formula           | C <sub>2</sub> H <sub>10</sub> N <sub>2</sub> O <sub>0.042(4)</sub> PbI <sub>4</sub> | C <sub>4</sub> H <sub>20</sub> N <sub>4</sub> PbI <sub>4</sub> Cl <sub>2</sub> |
| Formula weight (g/mol)      | 777.60                                                                               | 909.94                                                                         |
| Space group                 | R $\bar{3}$                                                                          | Pbcm                                                                           |
| a, Å                        | 14.5906(1)                                                                           | 8.7590(4)                                                                      |
| b, Å                        | 14.5906(1)                                                                           | 9.4400(4)                                                                      |
| c, Å                        | 32.7775(5)                                                                           | 23.5450(8)                                                                     |
| $\alpha$ , °                | 90                                                                                   | 90                                                                             |
| $\beta$ , °                 | 90                                                                                   | 90                                                                             |
| $\gamma$ , °                | 120                                                                                  | 90                                                                             |
| Z                           | 18                                                                                   | 4                                                                              |
| V, Å <sup>3</sup>           | 6043.00(14)                                                                          | 1946.82(14)                                                                    |
| $\rho$ (g/cm <sup>3</sup> ) | -                                                                                    | 3.105                                                                          |

Table S2. Observed FTIR Wavenumbers(cm<sup>-1</sup>) and band assignments

| Observed wavenumbers(cm <sup>-1</sup> ) |                    |                                                      |                                                                    | Assigned to                            |
|-----------------------------------------|--------------------|------------------------------------------------------|--------------------------------------------------------------------|----------------------------------------|
| en. 2HI                                 | EDPbI <sub>4</sub> | [(ED) <sub>2</sub> PbI <sub>4</sub> ]Cl <sub>2</sub> | Color-changed [(ED) <sub>2</sub> PbI <sub>4</sub> ]Cl <sub>2</sub> |                                        |
| 3142                                    | 3064               | 3090                                                 | 3091                                                               | NH <sub>3</sub> asymmetric stretching  |
| 2999                                    | 3006               | 2989                                                 | 2990                                                               | NH <sub>3</sub> symmetric stretching   |
| 2912                                    | 2925               | 2920                                                 | 2920                                                               | CH <sub>2</sub> asymmetric stretching  |
| 2785                                    | 2880               | 2850                                                 | 2850                                                               | CH <sub>2</sub> symmetric stretching   |
| 1627                                    | 1643               | 1644                                                 | 1643                                                               | NH <sub>3</sub> asymmetric deformation |
| 1560                                    | 1549               | 1563                                                 | 1560                                                               | NH <sub>3</sub> symmetric deformation  |
| 1491                                    | 1464               | 1481                                                 | 1481                                                               | CH <sub>2</sub> scissoring             |
| 1348                                    | -                  | 1439                                                 | 1439                                                               | CH <sub>2</sub> wagging                |
| 1311                                    | 1317               | 1307                                                 | 1307                                                               | CH <sub>2</sub> twisting               |
| -                                       | 1177               | 1154                                                 | 1155                                                               | NH <sub>3</sub> rocking                |
| 1026                                    | 1026               | 1019                                                 | 1018                                                               | CN stretching                          |
| 997                                     | 994                | 957                                                  | 957                                                                | NH <sub>3</sub> rocking                |
| 914                                     | 875                | 887                                                  | 887                                                                | CH <sub>2</sub> rocking                |
| 787                                     | 765                | 806                                                  | 806                                                                | CH <sub>2</sub> rocking                |
| 548,465                                 | 460                | 464                                                  | 464                                                                | *N-C-C-N <sup>+</sup> bending          |

### Theoretical calculation of weight loss percentage:

The calculation was performed as follows:

For each crystal, we assumed that the following species (listed in Table S3) can remove from the structure. Based on the molecular weight (Mw) of the crystals (according to the Table S1) and Mw of the considered species, the weight loss percentages were calculated. By comparing the loss percentage values obtained from TGA analysis with those calculated theoretically we determined the possible decomposed fragments.

Table S3. Theoretical weight loss percentages for EDPbI<sub>4</sub> and [(ED)<sub>2</sub>PbI<sub>4</sub>]Cl<sub>2</sub> crystals

| Crystal formula                                      | Considered fragment | Mw of the fragment<br>(Mw <sub>f</sub> , gr/mol) | Theoretical weight loss percentage<br>$(\frac{Mw_f}{Mw_{crystal}}) \times 100$ |
|------------------------------------------------------|---------------------|--------------------------------------------------|--------------------------------------------------------------------------------|
| EDPbI <sub>4</sub>                                   | ED+ 2I              | 315.92                                           | 40.63%                                                                         |
| [(ED) <sub>2</sub> PbI <sub>4</sub> ]Cl <sub>2</sub> | 2(ED)+ 2I+2Cl       | 448.94                                           | 49.34%                                                                         |
|                                                      | 2(ED)+ 3I+ Cl       | 540.39                                           | 59.39%                                                                         |
|                                                      | 2(ED)+ 4I           | 631.85                                           | 69.44%                                                                         |

### References:

[1] A. Glushkova, A. Arakcheeva, P. Pattison, M. Kollár, P. Andričević, B. Náfrádi, L. Forró and E. Horváth, *CrystEngComm*, 2018, **20**, 3543
